# Supplementary material for: Perceptions and Experiences of the University of Nottingham Pilot Asymptomatic Testing Service: A Mixed-Methods Study
Source: Preprints.org preprint supplement (doi:10.20944/preprints202012.0060.v1), 2020-12-02
Supplement: Supplementary file 1 [file supplementary]

Archive with 14 entries (14 files):
- Supplementary File 1 Pilot COVID-19 asymptomatic testing service.docx
- __MACOSX/._Supplementary File 1 Pilot COVID-19 asymptomatic testing service.docx
- Supplementary File 2 COREQ_Consolidated criteria for reporting qualitative studies .docx
- __MACOSX/._Supplementary File 2 COREQ_Consolidated criteria for reporting qualitative studies .docx
- Supplementary File 3 Sample characteristics for interview and focus group participants.docx
- __MACOSX/._Supplementary File 3 Sample characteristics for interview and focus group participants.docx
- Supplementary File 4 Post-Programme Student Evaluation Survey.pdf
- __MACOSX/._Supplementary File 4 Post-Programme Student Evaluation Survey.pdf
- Supplementary File 5 Interview and Focus Group Question Guide.docx
- __MACOSX/._Supplementary File 5 Interview and Focus Group Question Guide.docx
- Supplementary File 6 Thematic map illustrating the relationships between the key themes and subthemes.docx
- __MACOSX/._Supplementary File 6 Thematic map illustrating the relationships between the key themes and subthemes.docx
- Supplementary File 7 Key themes, subthemes and quotes.docx
- __MACOSX/._Supplementary File 7 Key themes, subthemes and quotes.docx
