# Supplementary material for: Perceptions and Experiences of the University of Nottingham Pilot Asymptomatic Testing Service: A Mixed-Methods Study
Source: Preprints.org preprint supplement (doi:10.20944/preprints202012.0060.v1), 2020-12-02
Supplement: Supplementary file 1 [file supplementary › Supplementary File 3 Sample characteristics for interview and focus group participants.docx]

**Supplementary File 3:** Sample characteristics for interview and focus group participants

| ID | Gender | Year of Study | Ind / SG / FG† | Date | Time | Duration (mins) |
| --- | --- | --- | --- | --- | --- | --- |
| P101 | F | 5 | IND | 16.10.20 | 16:30 | 36:31 |
| P106 | F | 5 | IND | 18.10.20 | 18:00 | 44:56 |
| P116 | F | 1 | IND | 24.10.20 | 19:00 | 48:33 |
| P112 | F | 1 | IND | 24.10.20 | 10:30 | 17:50 |
| P117 | F | 1 | IND | 25.10.20 | 14:30 | 50:47 |
| P121 | F | 1 | IND | 30.10.20 | 11:00 | 13:12 |
| P91 | F | 1 | SG | 02.09.20 | 14:00 | 32:50 |
| P92 | F | 1 | SG | 02.09.20 | 14:00 | 32:50 |
| P93 | F | 1 | SG | 02.09.20 | 14:00 | 32:50 |
| P99 | M | 1 | SG | 14.10.20 | 14:00 | 32:50 |
| P100 | M | 1 | SG | 14.10.20 | 14:00 | 32:50 |
| P104 | F | 1 | SG | 17.10.20 | 16:30 | 45:30 |
| P105 | M | 1 | SG | 17.10.20 | 16:30 | 45:30 |
| P102 | M | 5 | SG | 17.10.20 | 10:30 | 43:55 |
| P103 | F | 5 | SG | 17.10.20 | 10:30 | 43:55 |
| P107 | F | 1 | SG | 18.10.20 | 11:30 | 42:06 |
| P108 | M | 5 | SG | 18.10.20 | 11:40 | 42:06 |
| P109 | F | 5 | SG | 23.10.20 | 16:30 | 48:19 |
| P110 | F | 1 | SG | 23.10.20 | 16:30 | 48:19 |
| P111 | F | 1 | SG | 23.10.20 | 16:30 | 48:19 |
| P113 | F | 5 | SG | 24.10.20 | 16:30 | 48:48 |
| P114 | F | 5 | SG | 24.10.20 | 16:30 | 48:48 |
| P115 | F | 5 | SG | 24.10.20 | 16:30 | 48:48 |
| P118 | F | 1 | SG | 27.10.20 | 19:00 | 48:51 |
| P119 | F | 5 | SG | 27.10.20 | 19:00 | 48:51 |
| P120 | F | 1 | SG | 27.10.20 | 19:00 | 48:51 |
| P94 | F | 1 | FG | 25.09.20 | 13:00 | 53:49 |
| P95 | F | 1 | FG | 25.09.20 | 13:00 | 53:49 |
| P96 | F | 1 | FG | 25.09.20 | 13:00 | 53:49 |
| P97 | F | 1 | FG | 25.09.20 | 13:00 | 53:49 |
| P98 | F | 1 | FG | 25.09.20 | 13:00 | 53:49 |
| Staff Participants | | | | | | |
| ID | Gender | Job Role | Ind / SG / FG† | Date | Time | Duration  (mins) |
| P127 | F | University Teacher | FG | 28.10.20 | 15:00 | 70:58 |
| P129 | M | Senior tutor (academic) | FG | 28.10.20 | 15:00 | 70:58 |
| P130 | F | Teaching assistant | FG | 28.10.20 | 15:00 | 70:58 |
| P126 | F | Clinical academic | FG | 28.10.20 | 15:00 | 70:58 |
| P123 | F | Senior administrator | FG | 28.10.20 | 15:00 | 70:58 |
| P128 | F | Teaching associate | FG | 28.10.20 | 15:00 | 70:58 |
| P125 | F | University Teacher | FG | 28.10.20 | 15:00 | 70:58 |
| P124 | F | Clinical academic | FG | 28.10.20 | 15:00 | 70:58 |
| P122 | F | Administrator | FG | 28.10.20 | 15:00 | 70:58 |
| P131 | M | Head of School | FG | 28.10.20 | 15:00 | 70:58 |

†Ind: Individual Interview; SG: Small Group Interview (2-3 people); FG: Focus Group Interview (4+ people)

‡P-ATS (pilot asymptomatic testing service) participant, Y: yes, N: no.
