# Supplementary material for: Perceptions and Experiences of the University of Nottingham Pilot Asymptomatic Testing Service: A Mixed-Methods Study
Source: Preprints.org preprint supplement (doi:10.20944/preprints202012.0060.v1), 2020-12-02
Supplement: Supplementary file 1 [file supplementary › Supplementary File 6 Thematic map illustrating the relationships between the key themes and subthemes.docx]

**Supplementary File 6:** Thematic Map showing relationships between the key themes and subthemes
